# Supplementary material for: Effects of proprioceptive exercises on pain and function in chronic neck- and low back pain rehabilitation: a systematic literature review
Source: PubMed Central journal article supplement (PMC4247630; doi:10.1186/1471-2474-15-382), 2014-11-19
Supplement: 12891_2014_2326_MOESM3_ESM.pdf [file 12891_2014_2326_MOESM3_ESM.pdf]

Database(s): Ovid MEDLINE(R), Ovid MEDLINE(R) In-Process & Other Non-Indexed Citations, Ovid MEDLINE(R) Daily and Ovid OLDMEDLINE(R) 1946 to

Present

Search Strategy:

| #  | Searches                                                                                                                                                                                                                                                                                                                                                                                                                                    | Results |
|----|---------------------------------------------------------------------------------------------------------------------------------------------------------------------------------------------------------------------------------------------------------------------------------------------------------------------------------------------------------------------------------------------------------------------------------------------|---------|
| 1  | exp musculoskeletal pain/ or back pain/ or low back pain/ or chronic pain/ or piriformis muscle syndrome/ or nociceptive pain/ or pain, intractable/ or pelvic pain/                                                                                                                                                                                                                                                                        | 36492   |
| 2  | Patellofemoral Pain Syndrome/                                                                                                                                                                                                                                                                                                                                                                                                               | 390     |
| 3  | Joint Instability/                                                                                                                                                                                                                                                                                                                                                                                                                          | 13799   |
| 4  | Reflex Sympathetic Dystrophy/                                                                                                                                                                                                                                                                                                                                                                                                               | 3073    |
| 5  | Shoulder Pain/                                                                                                                                                                                                                                                                                                                                                                                                                              | 2520    |
| 6  | Myofascial Pain Syndromes/                                                                                                                                                                                                                                                                                                                                                                                                                  | 1141    |
| 7  | Fibromyalgia/                                                                                                                                                                                                                                                                                                                                                                                                                               | 5692    |
| 8  | or/1-7                                                                                                                                                                                                                                                                                                                                                                                                                                      | 61816   |
| 9  | ((pain or ache or discomfort or trouble or hurt or "muscle imbalance" or "muscular imbalance" or "muscle stiffness" or "muscle tightness") adj5 (shoulder or back or hip or "lower limb" or "upper limb" or neck or pelvic or muscular or muscle or joint or cervical or lumbar or refractory or "patellofemoral syndrome" or musculoskeletal or myofascial or "joint instability" or "piriformis muscle syndrome" or fibromyalgia)).ti,ab. | 69953   |
| 10 | 8 or 9                                                                                                                                                                                                                                                                                                                                                                                                                                      | 108153  |
| 11 | exp Arthritis/                                                                                                                                                                                                                                                                                                                                                                                                                              | 192690  |
| 12 | exp Spinal Cord Injuries/                                                                                                                                                                                                                                                                                                                                                                                                                   | 35407   |
| 13 | exp Arthroplasty, Replacement, Hip/                                                                                                                                                                                                                                                                                                                                                                                                         | 15480   |
| 14 | exp Arthroplasty, Replacement, Knee/                                                                                                                                                                                                                                                                                                                                                                                                        | 11051   |
| 15 | exp Rheumatic Diseases/                                                                                                                                                                                                                                                                                                                                                                                                                     | 168303  |
| 16 | Intervertebral Disc Displacement/                                                                                                                                                                                                                                                                                                                                                                                                           | 15191   |
| 17 | Anterior Cruciate Ligament/                                                                                                                                                                                                                                                                                                                                                                                                                 | 8948    |
| 18 | exp Rupture/                                                                                                                                                                                                                                                                                                                                                                                                                                | 33821   |
| 19 | Shoulder Impingement Syndrome/ or Femoracetabular Impingement/                                                                                                                                                                                                                                                                                                                                                                              | 1349    |

|    |                                                                                                                                                                                                                                                                                                                                                              |         |
|----|--------------------------------------------------------------------------------------------------------------------------------------------------------------------------------------------------------------------------------------------------------------------------------------------------------------------------------------------------------------|---------|
| 20 | (arthritis or arthrosis or "spinal cord injury" or tumor or tumour or cancer or neoplas* or "total knee replacement" or "total hip replacement" or arthroplasty or rheuma or "slipped disc" or hernia* or "anterior cruciate ligament" or rupture or impingement).ti,ab.                                                                                     | 1900693 |
| 21 | or/11-20                                                                                                                                                                                                                                                                                                                                                     | 2060593 |
| 22 | 10 not 21                                                                                                                                                                                                                                                                                                                                                    | 74650   |
| 23 | ((sensorimotor or "sensory motor" or sensory-motor or proprioception or proprioceptive or balance or "postural balance" or posture or postural or coordination or "motor coordination" or coordinative or cybernetic or multisensory or stabilizing or stabilising) adj15 (therap* or remad* or exercise* or train* or rehabilitation or technique*)).ti,ab. | 16769   |
| 24 | Feedback, Sensory/ or Postural Balance/                                                                                                                                                                                                                                                                                                                      | 13437   |
| 25 | cybernetics/                                                                                                                                                                                                                                                                                                                                                 | 2116    |
| 26 | Proprioception/                                                                                                                                                                                                                                                                                                                                              | 5853    |
| 27 | 24 or 25 or 26                                                                                                                                                                                                                                                                                                                                               | 20492   |
| 28 | (therap* or remad* or exercise* or train* or rehabilitation or technique*).ti,ab.                                                                                                                                                                                                                                                                            | 2997152 |
| 29 | 27 and 28                                                                                                                                                                                                                                                                                                                                                    | 4770    |
| 30 | 23 or 29                                                                                                                                                                                                                                                                                                                                                     | 19380   |
| 31 | 22 and 30                                                                                                                                                                                                                                                                                                                                                    | 776     |
| 32 | RANDOMIZED CONTROLLED TRIAL.pt.                                                                                                                                                                                                                                                                                                                              | 343002  |
| 33 | CONTROLLED CLINICAL TRIAL.pt.                                                                                                                                                                                                                                                                                                                                | 85733   |
| 34 | RANDOMIZED CONTROLLED TRIAL.sh.                                                                                                                                                                                                                                                                                                                              | 343002  |
| 35 | RANDOM ALLOCATION.sh.                                                                                                                                                                                                                                                                                                                                        | 76622   |
| 36 | DOUBLE BLIND METHOD.sh.                                                                                                                                                                                                                                                                                                                                      | 118556  |
| 37 | SINGLE BLIND METHOD.sh.                                                                                                                                                                                                                                                                                                                                      | 17105   |
| 38 | or/32-37                                                                                                                                                                                                                                                                                                                                                     | 499216  |
| 39 | (ANIMALS not HUMANS).sh.                                                                                                                                                                                                                                                                                                                                     | 3721536 |
| 40 | 38 not 39                                                                                                                                                                                                                                                                                                                                                    | 455904  |
| 41 | CLINICAL TRIAL.pt.                                                                                                                                                                                                                                                                                                                                           | 476906  |
| 42 | exp clinical trial/                                                                                                                                                                                                                                                                                                                                          | 707267  |
| 43 | (clin\$ adj25 trial\$).ti,ab.                                                                                                                                                                                                                                                                                                                                | 234754  |
| 44 | ((singl\$ or doubl\$ or trebl\$ or tripl\$) adj25 (blind\$ or mask\$)).ti,ab.                                                                                                                                                                                                                                                                                | 124598  |
| 45 | PLACEBOS.sh.                                                                                                                                                                                                                                                                                                                                                 | 31597   |

|    |                                                                                                                                                                                                                                             |         |
|----|---------------------------------------------------------------------------------------------------------------------------------------------------------------------------------------------------------------------------------------------|---------|
| 46 | placebo\$.ti,ab.                                                                                                                                                                                                                            | 147069  |
| 47 | random\$.ti,ab.                                                                                                                                                                                                                             | 632437  |
| 48 | RESEARCH DESIGN.sh.                                                                                                                                                                                                                         | 68723   |
| 49 | or/41-48                                                                                                                                                                                                                                    | 1285759 |
| 50 | 49 not 39                                                                                                                                                                                                                                   | 1190446 |
| 51 | 50 not 40                                                                                                                                                                                                                                   | 750481  |
| 52 | COMPARATIVE STUDY.sh.                                                                                                                                                                                                                       | 1622202 |
| 53 | exp EVALUATION STUDIES/                                                                                                                                                                                                                     | 175855  |
| 54 | FOLLOW UP STUDIES.sh.                                                                                                                                                                                                                       | 463889  |
| 55 | PROSPECTIVE STUDIES.sh.                                                                                                                                                                                                                     | 334413  |
| 56 | (control\$ or prospectiv\$ or volunteer\$).ti,ab.                                                                                                                                                                                           | 2771199 |
| 57 | or/52-56                                                                                                                                                                                                                                    | 4487554 |
| 58 | 57 not 39                                                                                                                                                                                                                                   | 3521294 |
| 59 | 58 not (40 or 51)                                                                                                                                                                                                                           | 2853900 |
| 60 | 40 or 51 or 59                                                                                                                                                                                                                              | 4060285 |
| 61 | intervention studies/                                                                                                                                                                                                                       | 5705    |
| 62 | (intervention* adj3 (stud* or trial or setting or procedure)).mp. [mp=title, abstract, original title, name of substance word, subject heading word, protocol supplementary concept, rare disease supplementary concept, unique identifier] | 35935   |
| 63 | 61 or 62                                                                                                                                                                                                                                    | 35935   |
| 64 | 60 or 63                                                                                                                                                                                                                                    | 4071640 |
| 65 | 31 and 64                                                                                                                                                                                                                                   | 472     |
| 66 | limit 31 to ("review" or systematic reviews)                                                                                                                                                                                                | 168     |

1. **Manual therapy with and without vestibular rehabilitation for cervicogenic dizziness: a systematic review.**

Lystad RP. Bell G. Bonnevie-Svendsen M. Carter CV.

*Chiropractic & manual therapies.* 19(1):21, 2011.

[Journal Article]

UI: 21923933

**Authors Full Name**

Lystad, Reidar P. Bell, Gregory. Bonnevie-Svendsen, Martin. Carter, Catherine V.

---
