# Supplementary material for: Effects of proprioceptive exercises on pain and function in chronic neck- and low back pain rehabilitation: a systematic literature review
Source: PubMed Central journal article supplement (PMC4247630; doi:10.1186/1471-2474-15-382), 2014-11-19
Supplement: 12891_2014_2326_MOESM5_ESM.pdf [file 12891_2014_2326_MOESM5_ESM.pdf]

|                | Random sequence generation (selection bias) | Allocation concealment (selection bias) | Blinding of participants and personnel (performance bias) | Blinding of outcome assessment (detection bias) | Incomplete outcome data (attrition bias) | Selective reporting (reporting bias) | Group similarity at baseline | Co-interventions | Compliance | Intention-to-treat-analysis | Timing of outcome assessments | Other bias |
|----------------|---------------------------------------------|-----------------------------------------|-----------------------------------------------------------|-------------------------------------------------|------------------------------------------|--------------------------------------|------------------------------|------------------|------------|-----------------------------|-------------------------------|------------|
| Beinert 2013   | ?                                           | ?                                       | -                                                         | +                                               | +                                        | +                                    | -                            | +                | +          | +                           | +                             | +          |
| Chung 2013     | ?                                           | ?                                       | -                                                         | ?                                               | +                                        | +                                    | +                            | +                | +          | -                           | +                             | +          |
| Costa 2009     | +                                           | +                                       | +                                                         | +                                               | +                                        | +                                    | +                            | +                | +          | +                           | +                             | +          |
| Frih 2009      | ?                                           | ?                                       | -                                                         | ?                                               | ?                                        | +                                    | +                            | -                | +          | +                           | +                             | +          |
| Gatti 2011     | ?                                           | -                                       | -                                                         | +                                               | +                                        | +                                    | -                            | +                | +          | +                           | +                             | +          |
| Hudson 2010    | +                                           | +                                       | -                                                         | +                                               | +                                        | +                                    | -                            | -                | +          | +                           | +                             | +          |
| Humphreys 2002 | ?                                           | ?                                       | -                                                         | -                                               | ?                                        | +                                    | -                            | -                | ?          | -                           | +                             | +          |
| Jin 2013       | +                                           | ?                                       | -                                                         | -                                               | +                                        | +                                    | +                            | +                | +          | +                           | +                             | +          |
| Johannsen 1995 | ?                                           | ?                                       | -                                                         | -                                               | -                                        | -                                    | -                            | +                | ?          | -                           | ?                             | +          |
| Jull 2007      | ?                                           | ?                                       | -                                                         | +                                               | -                                        | +                                    | +                            | +                | ?          | -                           | +                             | +          |
| Marshall 2008  | ?                                           | ?                                       | -                                                         | ?                                               | -                                        | +                                    | +                            | +                | ?          | -                           | +                             | +          |
| Morone 2012    | +                                           | +                                       | -                                                         | +                                               | +                                        | -                                    | +                            | +                | +          | +                           | +                             | ?          |
| Paolucci 2012  | ?                                           | ?                                       | -                                                         | ?                                               | ?                                        | +                                    | ?                            | +                | +          | -                           | +                             | +          |
| Revel 1994     | ?                                           | ?                                       | -                                                         | ?                                               | ?                                        | +                                    | +                            | +                | +          | +                           | +                             | +          |
| Sorensen 2010  | ?                                           | +                                       | -                                                         | +                                               | +                                        | +                                    | +                            | -                | +          | +                           | +                             | +          |
| Stankovic 2012 | -                                           | -                                       | -                                                         | -                                               | -                                        | -                                    | +                            | +                | ?          | -                           | +                             | +          |
| Suni 2006      | ?                                           | ?                                       | -                                                         | +                                               | +                                        | -                                    | ?                            | -                | +          | +                           | +                             | +          |
| Taimela 2000   | ?                                           | ?                                       | -                                                         | +                                               | +                                        | -                                    | +                            | -                | ?          | +                           | +                             | +          |
